# Supplementary material for: Cation ATPase (ATP4) Orthologue Replacement in the Malaria Parasite Plasmodium knowlesi Reveals Species-Specific Responses to ATP4-Targeting Drugs
Source: PubMed Central journal article supplement (PMC9600963; doi:10.1128/mbio.01178-22), 2022-10-03
Supplement: mbio.01178-22-s0001.pdf [file mbio.01178-22-s0001.pdf]

L350H

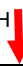

I398F

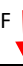

P412T

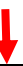

V415D

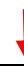

PBANKA\_0610400 520 CFATTSVTNGCGKGVISTGLNTQVGKIASQLKKSSEGSKLTPLQVSLNPLGGLIGLIAIIVLMLIITLALINLYKDPAHADKDPILVIIIGVGFVAVSSVPEGLPMVVT  
PmUG01\_13021900 393 CFATTSVTNGSGKGVISTGLDQVGKIASQLKKSSEGSKLTPLQVALNKLGGGLIGLIAIIVLIIITLAVLINYRDPAHADKDPILAVIIIGVGFVAVSSVPEGLPMVVT  
PocGH01\_1302190 459 CFATTSVTNGYVGGKGVISTGLFTQVGKIASQLKKSSEGSKLTPLQVALNKLGGGLIGLIAIIVLFIITLAVLINYRDPAHADKDPILVIIIGVGFVAVSSVPEGLPMVVT  
Pow\_SBT45090.1 504 CFATTSVTNGYVGGKGVISTGLFTQVGKIASQLKKSSEGSKLTPLQVALNKLGGGLIGLIAIIVLFIITLAVLINYRDPAHADKDPILVIIIGVGFVAVSSVPEGLPMVVT  
PF3D7\_1211900 307 CFATTSVTSGSGKGVISTGLDQVGKIASQLKKSSEGSKLTPLQVALNKLGGGLIGLIAIIVLVIISLAVLTKYRDPAHADKDPTEVIIIGVGFVAVSSPEGLPMVVT  
PKA1H\_130016600 325 CFATTSVTNGSGKGVISTGLNTQVGKIASQLKKSSEGSKLTPLQVALNKLGGGLIGLIAIIVLFIISLAVLINYRDPAHADKDPILVIIIGVGFVAVSSVPEGLPMVVT  
PVP01\_1311100 382 CFATTSVTNGSGKGVISTGLNTQVGKIASQLKKSSEGSKLTPLQVALNKLGGGLIGLIAIIVLFIISLAVLINYRDPAHADKDPILVIIIGVGFVAVSSVPEGLPMVVT

PBANKA\_0610400 630 ITLSAGAKDMVKKANVRKLPVAVETLGCCSVICSDKTGTLTEGKMTAINVTFCKNSKLHDK-----NELTKTYDFYPTKGFEPSSGGLFDSLELTSEIKKKIVIAKNK  
PmUG01\_13021900 503 ITLSAGAKDMVKKANVRKLPVAVETLGCCSVICSDKTGTLTEGKMTAINAVTFCKNSLSDN-----NNKLTKTDFDYPTKGFEPYGGGLFDSSELTSEIKKKIVIAKNE  
PocGH01\_1302190 569 ITLSAGAKDMVKKANVRKLPVAVETLGCCSVICSDKTGTLTEGKMTAINAVTFCKNSLSDLTDPDNIVENGLTKTDFDYPTKGFEPYGGGLFDSNLTSEIKKKIVIAKNQ  
Pow\_SBT45090.1 614 ITLSAGAKDMVKKANVRKLPVAVETLGCCSVICSDKTGTLTEGKMTAINAVTFCKNSLSDLTDPDNIVENGLTKTDFDYPTKGFEPYGGGLFDSNLTSEIKKKIVIAKNQ  
PF3D7\_1211900 417 ITLSAGAKDMVKKANVRKLPVAVETLGCCSVICSDKTGTLTEGKMTAINAVTICKNSLSD-----NNKLTKTDFDYPTKGFEPYGGGLFDSNELTSEIKKKIVIAKNQ  
PKA1H\_130016600 435 ITLSAGAKDMVKKANVRKLPVAVETLGCCSVICSDKTGTLTEGKMTAINAVTFAKNSLSDK-----NNMLTKTDFDYPTKGFEPYGGGLFDSGKLTNELKKKIVIAKNQ  
PVP01\_1311100 492 ITLSAGAKDMVKKANVRKLPVAVETLGCCSVICSDKTGTLTEGKMTAINLVTFCKNSLSDK-----NNKLTKTDFDYPTKGFEPYGGGLFDSKLTNELKKKIVIAKNQ

PBANKA\_0610400 733 NISYDSILQNYGNPESKNIINVYKTRSLMLAAYLNSYDITLTKNLKTKGWEIQGNMSEGPVVAAAKAGYNIFFNSENNEENYIKKIKRLEDLEITFNSSRKMKIIFYKLI  
PmUG01\_13021900 607 NKSFFSILYNYGNPDKNSFAVDKTRALMFAAYLNSYDITLTKRDSKTAKIWIQGNMSEGPVVAAAKAGYNIFFNSENNEENYIKKIKRLEDLEITFNSSRKMKIIFYKLI  
PocGH01\_1302190 679 SISYDILYNYGNPENKSVHVCKIRSLMFAAYLNSYDITLTKSRDPKTSKWTIQGNMSEGPVVAAAKAGYNIFFNSENNEENYIKKIKRLEDLEITFNSSRKMKIIFYKLI  
Pow\_SBT45090.1 724 SISYDILYNYGNPENKSVHVCKIRSLMFAAYLNSYDITLTKSRDPKTSKWTIQGNMSEGPVVAAAKAGYNIFFNSENNEENYIKKIKRLEDLEITFNSSRKMKIIFYKLI  
PF3D7\_1211900 521 NTSYDKVLYNYGNPESKNSVIVDKTRSLMFAAYLNSYDITLTKSRDPKTKWGIHQGNMSEGPVVAAAKAGYNIFFNSENNEENYIKKIKRLEDLEITFNSSRKMKIIFYKLI  
PKA1H\_130016600 539 NISYDSILYDYGNEPKNSIDVKKTRSLMFAAYLNSYDITLTKSRDPKTSKWTIQGNMSEGPVVAAAKAGYNIFFNSENNEENYIKKIKRLEDLEITFNSSRKMKIIFYKLI  
PVP01\_1311100 596 SISFFSILYNYGNPENKSVHVCKIRSLMFAAYLNSYDITLTKSRDPKTSKWTIQGNMSEGPVVAAAKAGYNIFFNSENNEENYIKKIKRLEDLEITFNSSRKMKIIFYKLI

PBANKA\_0610400 843 ENNKFEINLKNKNTNVAYTHIAFKIGAPDKLIDISTNLLKET-QGEIQVSWDKQISDNEKILITNKNIELSOKALRVLAVCIKPLTDTQIEHLRTYEDADERLKFVKT  
PmUG01\_13021900 715 IENQFEQIVLHN--ENEKYTHIALIKGAPDKLLDRSTHLLLEET-DKGVATEWNNKITEQEKNIYLNKLELSRQKALRVLAVCIKPLTDKNEIELKILDDADERLKFVNYG  
PocGH01\_1302190 789 VENRFEYIHLN--GDKKYTHIALIKGAPDKLLDRSTHLLLEET-KRGAQIAWSSKITEKEKDILIKKLELSQKALRVLAVCIKPLTDENIAHLKSLDADERLKFVNL  
Pow\_SBT45090.1 834 VENRFEYIHLN--GNKKYTHIALIKGAPDKLLDRSTHLLLEET-KRGAQIAWSSKITEKEKDILIKKLELSQKALRVLAVCIKPLTDENIAHLKSLDADERLKFVNL  
PF3D7\_1211900 629 TVNVFENVYLLK--PGKVYTHIALIKGAPDKLLDRSTHLLLEETSMKKVQVSWNSTITQEERNVLIKKLELSQKALRVLSICIKPLTDONIEELKKLEDADERLKFVNYD  
PKA1H\_130016600 647 KENMFEYIHLR--TGKVFETHIALIKGAPDKLLDRSTHLLLEES-PKGPQICWSAKISENEKDVLAQKLELSQKALRVLAVCIKPLTSEHISLKSLLDADERLKFVTTD  
PVP01\_1311100 704 KEDTFEYIHLR--PGKVFETHIALIKGAPDKLLDRSTHLLLEES-PKGPQICWSAKISENEKDVLAQKLELSQKALRVLAVCIKPLTSEHIDMLKRLDDADERLKFVTTD

PBANKA\_0610400 952 EQ-CGFIPPLGYIASFDPPRSGVKEAIQTCRNAQVKVIMITGDQKPTAIAIGKLIIGLILNKKSEDEIKDN-----EQYDLDNNSNIIRAIECSELHIN  
PmUG01\_13021900 822 QYGGGIPPLGYIASFDPPRPGVKEAIQTCREAKQVKVIMITGDQKPTAIAIGKLIIGLILKSEGVVGEKEEVEVHKVEGISKDDDDGKCNNGNDVHKVEEAIECSELHIN  
PocGH01\_1302190 896 PQ-GGFIPPLGYIASFDPPRPGVKEAIQTCREAQQVKVIMITGDQKPTAIAIGKLIIGLILSEKGEEDDK-----EG-----NTVEQSLGQSEAIECSELHIN  
Pow\_SBT45090.1 941 PQ-GGFIPPLGYIASFDPPRPGVKEAIQTCREAQQVKVIMITGDQKPTAIAIGKLIIGLILSEKGEEDDK-----EG-----NTVEQSLGQSEAIECSELHIN  
PF3D7\_1211900 737 EN-GGFIPPLGYIASFDPPRPGVKEAIQTCREAQQVKVIMITGDQKPTAIAIGKLIIGLILSEKSEQV-----EDINSLAIECSELHIN  
PKA1H\_130016600 754 ED-SGFIPPLGYIASFDPPRPGVKEAIQTCRNAQVKVIMITGDQKPTAIAIGKLIIGLIGEDKAGQAQQA-----DG-----HGDRANEADAQAEIECSELHIN  
PVP01\_1311100 811 EE-SGFIPPLGYIASFDPPRPGVKEAIQTCRNAQVKVIMITGDQKPTAIAIGKLIIGLILSEKSEQV-----EGPGQTGA-----ATANMQAEIECSELHIN

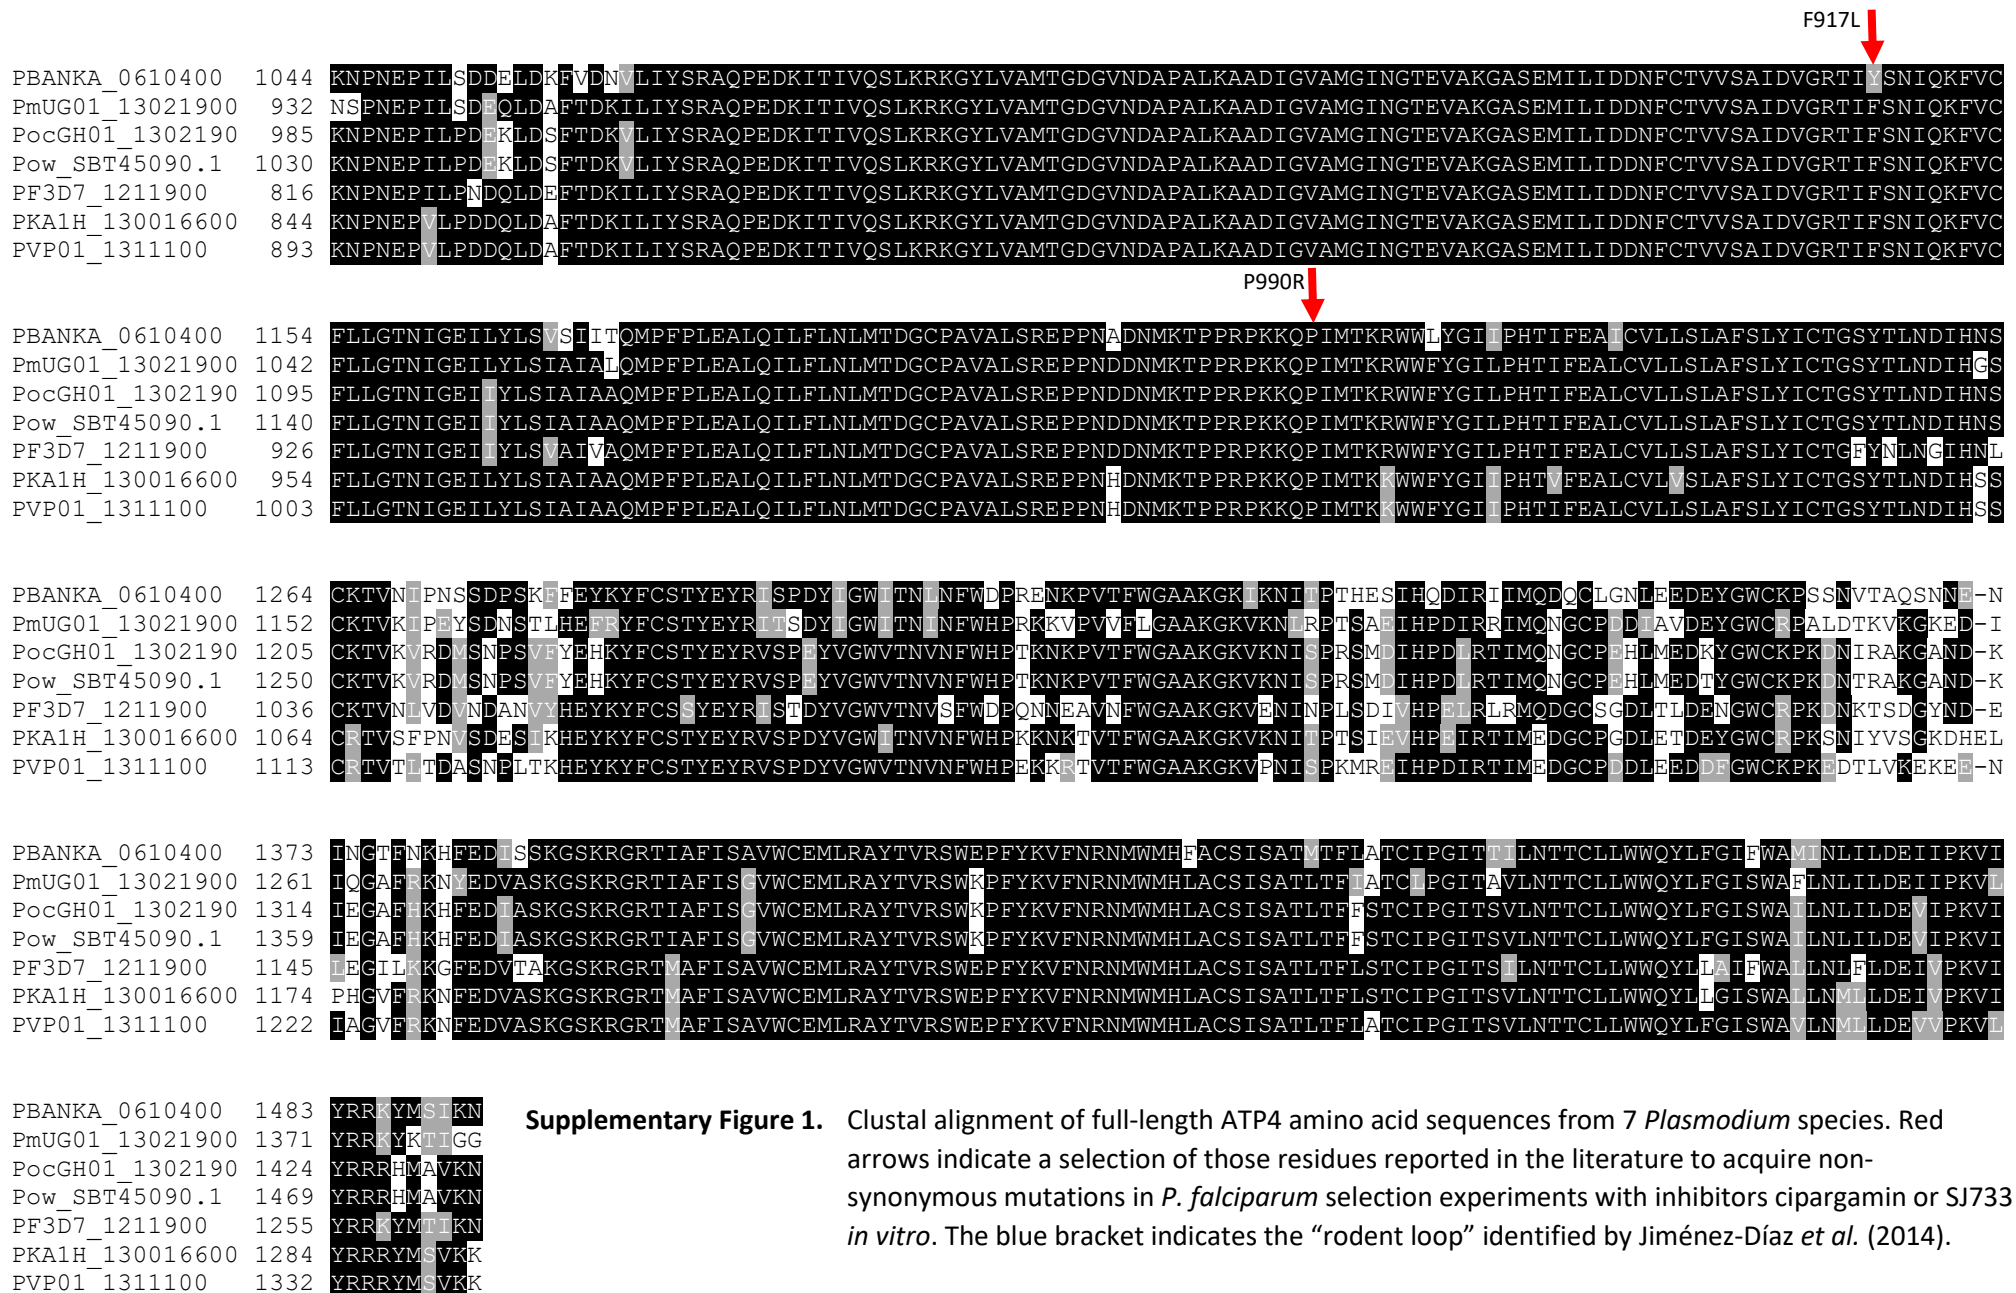

**Supplementary Figure 1.** Clustal alignment of full-length ATP4 amino acid sequences from 7 *Plasmodium* species. Red arrows indicate a selection of those residues reported in the literature to acquire non-synonymous mutations in *P. falciparum* selection experiments with inhibitors cipargamin or SJ733 *in vitro*. The blue bracket indicates the “rodent loop” identified by Jiménez-Díaz *et al.* (2014).
