# Supplementary material for: Cation ATPase (ATP4) Orthologue Replacement in the Malaria Parasite Plasmodium knowlesi Reveals Species-Specific Responses to ATP4-Targeting Drugs
Source: PubMed Central journal article supplement (PMC9600963; doi:10.1128/mbio.01178-22), 2022-10-03

**Figure S2. Comparison of I-TASSER and AlphaFold models of PfATP4.** Left: global structural alignment of PfATP4 models produced by AlphaFold (blue) and I-TASSER (tan) with inset window displaying the drug-binding pocket. Arrow indicates the primary structural perturbation in the drug binding pocket, a displacement of helices  $\alpha_5$  and  $\alpha_6$  downwards by approximately 6Å in the AlphaFold model compared to the I-TASSER models. Right: AlphaFold Confidence Map coloured by pLDDT score (source: exported from AlphaFold structural repository with UniProt identifier A0A143ZZK9).

**Global Structural Alignment**

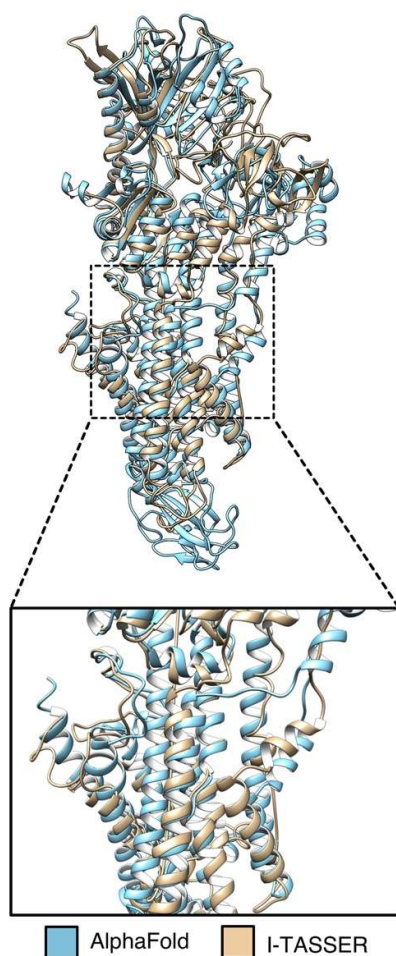

**Model Confidence Map (AF)**

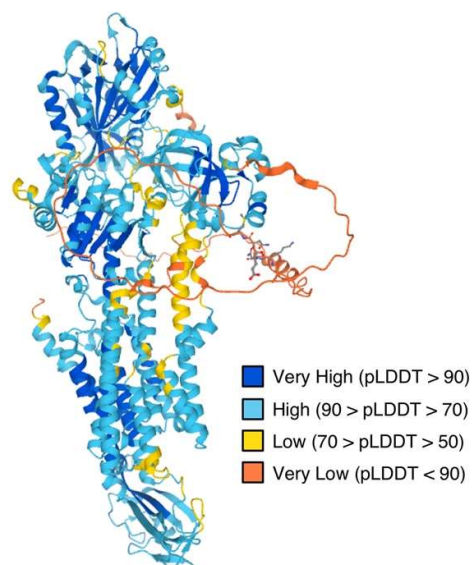

Supplement: mbio.01178-22-s0002.pdf [file mbio.01178-22-s0002.pdf]
